# Supplementary material
Source: ML conference proceedings conference paper supplement (https://openaccess.thecvf.com/content/CVPR2023/html/Hu_Efficient_Semantic_Segmentation_CVPR_2023_paper.html)
Supplement: Supplementary file 3 [file Hu_Efficient_Semantic_Segmentation_CVPR_2023_supplemental.zip]

Archive with 4 entries (4 files):
- camera_ready_video_1M.mov
- __MACOSX/._camera_ready_video_1M.mov
- supp_CameraReady_CVPR_2023_submit.pdf
- __MACOSX/._supp_CameraReady_CVPR_2023_submit.pdf
